# Supplementary material
Source: Elsevier journal article supplement (https://www.sciencedirect.com/science/article/pii/S1885585716303723)
Supplement: mmc1 [file mmc1.pdf]

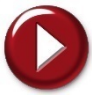

## Material suplementario

---

# Infecciones en dispositivos de estimulación cardiaca: diagnóstico y tratamiento en un centro de referencia

---

### Procedimiento quirúrgico

Un equipo especialmente entrenado en la técnica, con un periodo de aprendizaje tutelado de 2 años, hizo todas las extracciones en el mismo quirófano de cirugía cardiaca. La tracción percutánea se realizaba siempre con anestesia general e intubación orotraqueal, monitorización de presión arterial, canalización de vía venosa central y colocación de marcapasos percutáneo preventivo.

A través de una vía periférica, se realizaba previamente una flebografía para comprobar la permeabilidad de los sistemas subclavios, y durante el proceso de extracción se realizaba monitorización ecocardiográfica transesofágica para el control de las complicaciones.

Para las tracciones percutáneas, se utilizaron estiletes fijadores y vainas de disección metálicas (subclavia) desde 1985 a 1999, de radiofrecuencia de 1999 a 2010 y mecánicas autorrotatorias en los últimos 5 años, así como asas de captura femoral y pinzas introducidas por vía yugular en casos de cables rotos. Los mismos cirujanos implicados en el programa realizaron las extracciones mediante cirugía cardiaca abierta. El tamaño de las vegetaciones detectadas en la ecografía no se consideró un factor limitante para la tracción percutánea, que fue siempre la técnica de elección, salvo impedimento técnico (cables traccionados o rotos) desde la implantación del programa.

Después de la extracción, si el paciente presentaba síntomas que hicieran sospechar una embolia pulmonar, hasta el año 2000 se realizaba una gammagrafía de ventilación-perfusión y después, una angiografía por tomografía computarizada para confirmarla. En caso de sospecha de trombosis venosa profunda tras la extracción, se realizó una flebografía para confirmarla.

### **Reimplante del dispositivo de electroestimulación**

Cada caso era evaluado por los electrofisiólogos, que decidía la pertinencia de reimplantar el DEC. Podía hacerse en el mismo acto quirúrgico o en 2 tiempos. La asignación de los pacientes a los diferentes grupos (recambio en 1 frente a 2 tiempos) no se hizo de manera aleatoria, sino motivada por razones técnicas de aprovechamiento de quirófanos, lo que permitía realizar 2 extracciones en una mañana en la misma sala operatoria. Los marcapasos se reimplantaban habitualmente en quirófano en el mismo tiempo de la extracción. En pacientes dependientes de marcapasos, se implantaban primero los cables del nuevo dispositivo de manera contralateral, fijando el electrodo de ventrículo derecho y conectándolo a un generador externo, para garantizar así la estimulación durante la extracción. Acto seguido se procedía a la extracción del sistema infectado, con resección completa de la bolsa y cierre de la herida por primera intención. Finalmente, una vez lograda la extracción, se volvía a comprobar el funcionamiento de los electrodos implantados, se conectaban al generador definitivo y se insertaba este en su bolsa. En las infecciones sistémicas el único requisito exigido para realizar el recambio en 1 solo tiempo era la negatividad previa de los hemocultivos. En caso de no haberlo conseguido y considerarse necesaria la extracción sin demora (p. ej., en casos de sepsis grave), si el paciente era dependiente de marcapasos, se colocaba un marcapasos transitorio por vía femoral y una vez conseguida la negatividad de los hemocultivos, se realizaba el implante definitivo contralateral.

Por el contrario, los desfibriladores automáticos implantables y las resincronizaciones se reimplantaban normalmente 48-72 h después por los cardiólogos en su laboratorio de electrofisiología o en el hospital de referencia del que venía remitido el paciente. En el intervalo entre la extracción y el reimplante se monitorizaba al paciente de manera telemétrica en la cama de hospitalización.
